# Supplementary material for: A Key Factor for Psychosomatic Burden of Frontline Medical Staff: Occupational Pressure During the COVID-19 Pandemic in China
Source: PubMed Central journal article supplement (PMC7848019; doi:10.3389/fpsyt.2020.590101), 2021-01-18

**Supplementary Table 1. NJSQ**

|    |                                                           | none | mild | moderate | much | extreme |
|----|-----------------------------------------------------------|------|------|----------|------|---------|
| 1  | The social status of nursing work is too low              |      |      |          |      |         |
| 2  | Little opportunity to further study                       |      |      |          |      |         |
| 3  | Low wages and other benefits                              |      |      |          |      |         |
| 4  | Too few opportunities for promotion                       |      |      |          |      |         |
| 5  | Often shifting work                                       |      |      |          |      |         |
| 6  | Less independence at work                                 |      |      |          |      |         |
| 7  | Unclear division of work                                  |      |      |          |      |         |
| 8  | Workload is too heavy                                     |      |      |          |      |         |
| 9  | Number of working nurses is not enough                    |      |      |          |      |         |
| 10 | No time for psychological care of patients                |      |      |          |      |         |
| 11 | Too much non-nursing work                                 |      |      |          |      |         |
| 12 | Too much useless paperwork                                |      |      |          |      |         |
| 13 | Poor working environment                                  |      |      |          |      |         |
| 14 | Insufficient instruments and equipment required           |      |      |          |      |         |
| 15 | Crowded Ward                                              |      |      |          |      |         |
| 16 | Worried about errors at work                              |      |      |          |      |         |
| 17 | The work is not understood by patients and family members |      |      |          |      |         |
| 18 | Patient's condition is too severe                         |      |      |          |      |         |

|    |                                                                                      |  |  |  |  |  |
|----|--------------------------------------------------------------------------------------|--|--|--|--|--|
| 19 | Patient's family number is impolite                                                  |  |  |  |  |  |
| 20 | Patient's request is too high or too much                                            |  |  |  |  |  |
| 21 | Patient is impolite                                                                  |  |  |  |  |  |
| 22 | Patient does not cooperate                                                           |  |  |  |  |  |
| 23 | Knowledge learned cannot meet the psychological needs of patients and their families |  |  |  |  |  |
| 24 | Lack of knowledge about patient education                                            |  |  |  |  |  |
| 25 | Worried that nursing operations will cause pain to patients                          |  |  |  |  |  |
| 26 | Sudden death of nursing patient                                                      |  |  |  |  |  |
| 27 | Lack of understanding and respect from other health workers                          |  |  |  |  |  |
| 28 | Insufficient understanding and support of managers                                   |  |  |  |  |  |
| 29 | Too much criticism from managers                                                     |  |  |  |  |  |
| 30 | Colleagues are too picky about nursing work                                          |  |  |  |  |  |
| 31 | Lack of understanding and support among colleagues                                   |  |  |  |  |  |
| 32 | Conflict with the managers                                                           |  |  |  |  |  |
| 33 | Difficult to work with some colleagues in the ward                                   |  |  |  |  |  |

|    |                                                              |  |  |  |  |  |
|----|--------------------------------------------------------------|--|--|--|--|--|
| 34 | Conflict with the colleagues                                 |  |  |  |  |  |
| 35 | Lack of friendly and cooperative atmosphere among colleagues |  |  |  |  |  |

**Supplementary Table 2.** Reliability and validity of assessment tools

| Scale       | Cronbach $\alpha$ | KMO   | Bartlett test $p$ value |
|-------------|-------------------|-------|-------------------------|
| SSS-8       | 0.845             | 0.873 | < 0.001                 |
| GAD-7       | 0.926             | 0.923 | < 0.001                 |
| PHQ-9       | 0.919             | 0.931 | < 0.001                 |
| DASS-stress | 0.930             | 0.921 | < 0.001                 |
| PSQI        | 0.905             | 0.872 | < 0.001                 |
| PTSS-10     | 0.839             | 0.890 | < 0.001                 |
| NJSQ        | 0.941             | 0.909 | < 0.001                 |

Cronbach  $\alpha > 0.8$ , the reliability is high; KMO  $> 0.8$ , the validity is high;  $p < 0.05$ , Factor analysis can be performed.

**Supplementary Table 3.** Sample distribution in different regions of China

| Province | Number | Province     | Number | Province                 | Number |
|----------|--------|--------------|--------|--------------------------|--------|
| Hubei    | 194    | Hunan        | 16     | Jiangxi                  | 4      |
| Shānxi   | 192    | Shandong     | 13     | Tianjin                  | 2      |
| Hebei    | 115    | Heilongjiang | 12     | Shānxi                   | 2      |
| Shanghai | 69     | Henan        | 9      | Gansu                    | 2      |
| Anhui    | 22     | Guangdong    | 6      | Hainan                   | 1      |
| Beijing  | 21     | Neimenggu    | 6      | International cargo ship | 1      |
| Jiangsu  | 18     | Liaoning     | 4      | Others (not specified)   | 14     |

**Supplementary Table 4.** Demographic characteristics of study population

| Characteristics                  | NMS<br>(n= 552)   | MS<br>(n= 171)   | Total<br>(n= 723) |
|----------------------------------|-------------------|------------------|-------------------|
| Sex, n(%)                        |                   |                  |                   |
| Female                           | 315(57.1)         | 115(67.3)        | 430(59.5)         |
| Male                             | 237(42.9)         | 56(32.7)         | 293(40.5)         |
| Age, Mean $\pm$ SD               | 34.32 $\pm$ 10.39 | 35.99 $\pm$ 8.01 | 34.71 $\pm$ 9.90  |
| Marital status, n(%)             |                   |                  |                   |
| Single                           | 181(32.8)         | 36(21.1)         | 217(30.0)         |
| Married                          | 353(63.9)         | 131(76.6)        | 484(66.9)         |
| Others                           | 18(3.3)           | 4(2.3)           | 22(3.0)           |
| Education, n(%)                  |                   |                  |                   |
| Junior high school or below      | 33(6.0)           | 0(0.0)           | 33(4.6)           |
| Vocational high school education | 108(19.6)         | 9(5.3)           | 117(16.2)         |
| College                          | 102(18.5)         | 18(10.5)         | 120(16.6)         |
| Bachelor                         | 235(42.6)         | 104(60.8)        | 339(46.9)         |
| Master                           | 62(11.2)          | 30(17.5)         | 92(12.7)          |
| PhD                              | 12(2.2)           | 10(5.8)          | 22(3.0)           |
| Geographic Location, n(%)        |                   |                  |                   |
| Wuhan                            | 22(4.0)           | 84(49.1)         | 106(14.7)         |
| Other parts of Hubei             | 78(14.1)          | 10(5.8)          | 88(12.2)          |
| Outside Hubei                    | 452(81.9)         | 77(45.0)         | 529(73.2)         |
| Occupation, n(%)                 |                   |                  |                   |
| MS                               |                   | 171(100.0)       | 171(23.7)         |
| Farmer                           | 21(3.8)           |                  | 21(3.0)           |
| Workman                          | 44(7.9)           |                  | 44(6.1)           |

|                               |           |          |           |
|-------------------------------|-----------|----------|-----------|
| Businessman                   | 16(2.8)   |          | 16(2.2)   |
| Service staff                 | 35(6.3)   |          | 35(4.8)   |
| Public functionary            | 150(27.1) |          | 150(20.7) |
| Intellectual                  | 66(11.9)  |          | 66(9.1)   |
| Enterprise staff              | 108(19.5) |          | 108(14.9) |
| Other                         | 112(20.2) |          | 112(15.5) |
| Working hours per day, n(%)   |           |          |           |
| <4 hours                      | 264(47.8) | 13(7.6)  | 277(38.3) |
| 4-8 hours                     | 174(31.5) | 97(56.7) | 271(37.5) |
| 8-12 hours                    | 96(17.4)  | 47(27.5) | 143(19.8) |
| > 12 hours                    | 18(3.3)   | 14(8.2)  | 32(4.4)   |
| Medical work experience, n(%) |           |          |           |
| <3 years                      |           | 22(12.9) |           |
| 3-5 years                     |           | 17(9.9)  |           |
| 6-10 years                    | -         | 34(19.9) | -         |
| > 10 years                    |           | 98(57.3) |           |
| Department, n(%)              |           |          |           |
| Clinic                        |           | 57(33.3) |           |
| Nursing                       |           | 63(36.8) |           |
| Administration                | -         | 6(3.5)   | -         |
| Others                        |           | 45(26.3) |           |
| Professional title, n(%)      |           |          |           |
| None                          |           | 13(7.6)  |           |
| Junior                        |           | 55(32.2) |           |
| Intermediate                  | -         | 88(51.5) | -         |
| Associate senior              |           | 12(7.0)  |           |

|                                  |   |           |   |
|----------------------------------|---|-----------|---|
| Senior                           |   | 3(1.8)    |   |
| Military medical personnel, n(%) |   |           |   |
| Yes                              |   | 91(53.2)  |   |
| No                               | - | 80(46.8)  | - |
| Anti-epidemic experience, n(%)   |   |           |   |
| Yes                              |   | 20(11.7)  |   |
| No, but trained                  | - | 82(48.0)  | - |
| None                             |   | 69(40.4)  |   |
| Occupational pressure, Mean ± SD | - | 7.23±2.30 | - |

**Supplementary Table 5.** Mental problems before the epidemic

| Status                                | NMS<br>(n= 552) | MS<br>(n= 171) | $\chi^2$ | <i>p value</i> |
|---------------------------------------|-----------------|----------------|----------|----------------|
| Mental problems before epidemic, n(%) |                 |                | 1.290    | 0.525          |
| None                                  | 537(97.3)       | 168(98.2)      |          |                |
| Mild                                  | 11(2.0)         | 3(1.8)         |          |                |
| Medium                                | 4(0.7)          | 0(0.0)         |          |                |

**Supplementary Table 6.** Comparison of NMS and non-exposure MS

| Variables       | NMS<br>(n = 552) | MS (Non-exposure group)<br>(n =48) |
|-----------------|------------------|------------------------------------|
| Quality of Life | 79.41±24.18      | 79.13±24.24                        |
| Somatic Symptom | 1.73±2.70        | 1.54±2.31                          |
| Anxiety         | 3.77±3.70        | 3.85±3.89                          |
| Depression      | 3.34±4.09        | 3.44±4.09                          |
| Stress          | 2.75±3.67        | 5.38±7.56                          |

|               |           |           |
|---------------|-----------|-----------|
| Sleep Quality | 4.26±3.54 | 5.04±4.15 |
| PTSS          | 1.47±2.21 | 1.75±2.26 |

---

**Supplementary Table 7.** Exploratory analyses of risk factors in different exposure group

| Variables                         | High-exposure group (n= 72) |                     | Low-exposure group (n= 51) |                   | Non-exposure group (n= 48) |                   |
|-----------------------------------|-----------------------------|---------------------|----------------------------|-------------------|----------------------------|-------------------|
|                                   | <i>p value</i>              | <i>OR(95% CI)</i>   | <i>p value</i>             | <i>OR(95% CI)</i> | <i>p value</i>             | <i>OR(95% CI)</i> |
| <i>Models for quality of life</i> |                             |                     | No variables were entered  |                   | No variables were entered  |                   |
| Anti-epidemic experience          | 0.046                       | 0.44(0.19, 0.98)    |                            |                   |                            |                   |
| Occupational pressure             | <0.01                       | 0.07(0.02, 0.34)    |                            |                   |                            |                   |
| <i>Models for Somatic Symptom</i> |                             |                     |                            |                   |                            |                   |
| Education                         |                             |                     | 0.014                      | 3.35(1.28, 8.81)  |                            |                   |
| Location                          |                             |                     | 0.025                      | 0.23(0.06, 0.83)  | 0.035                      | <0.001(0, 0.67)   |
| Anti-epidemic experience          | 0.019                       | 2.53(1.17, 5.49)    |                            |                   |                            |                   |
| Occupational pressure             | <0.01                       | 16.83(3.84, 73.85)  |                            |                   |                            |                   |
| <i>Models for Anxiety</i>         |                             |                     |                            |                   |                            |                   |
| Sex                               | 0.029                       | 3.47(1.14, 10.57)   |                            |                   |                            |                   |
| Medical work experience           |                             |                     | <0.01                      | 5.4(1.57, 18.54)  |                            |                   |
| Education                         |                             |                     | 0.01                       | 3.16(1.32, 7.55)  |                            |                   |
| Location                          |                             |                     |                            |                   | <0.01                      | 0.03(0, 0.26)     |
| Occupational pressure             | <0.01                       | 28.05(5.43, 144.89) |                            |                   |                            |                   |
| <i>Models for Depression</i>      |                             |                     |                            |                   |                            |                   |
| Anti-epidemic experience          | <0.01                       | 3.35(1.42, 7.89)    |                            |                   |                            |                   |
| Education                         |                             |                     | 0.049                      | 2.6(1, 6.76)      |                            |                   |
| Location                          |                             |                     |                            |                   | <0.01                      | 0.03(0, 0.28)     |
| Occupational pressure             | <0.01                       | 39.69(7.22, 218.11) |                            |                   |                            |                   |
| <i>Models for Stress</i>          |                             |                     |                            |                   |                            |                   |
| Working hours per day             |                             |                     |                            |                   | 0.023                      | 3.28(1.18, 9.18)  |
| Education                         |                             |                     | 0.013                      | 3.12(1.27, 7.69)  |                            |                   |



|                                 |                           |                     |       |                      |       |                  |
|---------------------------------|---------------------------|---------------------|-------|----------------------|-------|------------------|
| Medical work experience         |                           |                     | 0.045 | 3.5(1.03, 11.94)     |       |                  |
| Occupational pressure           | <0.01                     | 33.25(5.44, 203.36) |       |                      |       |                  |
| <i>Models for Sleep Quality</i> |                           |                     |       |                      |       |                  |
| Education                       |                           |                     | <0.01 | 6.88(2.26, 20.88)    |       |                  |
| Location                        |                           |                     | 0.01  | 0.13(0.03, 0.61)     | <0.01 | 0.05(0.01, 0.47) |
| Professional title              |                           |                     | 0.015 | 0.3(0.11, 0.79)      |       |                  |
| Military personnel or no        |                           |                     | <0.01 | 0.04(0, 0.33)        |       |                  |
| Occupational pressure           | <0.01                     | 8.51(1.97, 36.82)   |       |                      |       |                  |
| Working hours per day           |                           |                     |       |                      | 0.044 | 2.42(1.03, 5.72) |
| <i>Models for PTSS</i>          |                           |                     |       |                      |       |                  |
|                                 | No variables were entered |                     |       |                      |       |                  |
| Location                        |                           |                     |       |                      | 0.02  | 0.005(0, 0.432)  |
| Medical work experience         |                           |                     | 0.049 | 33.09(1.02, 1071.71) |       |                  |

Note: The results maybe not robust enough due to the limitation of sample size in each regression model.

**Supplementary Table 8.** Comparison of occupational indicators between different exposure group in MS

| Indicators | High-exposure group (n= 72) | Low-exposure group (n= 51) | Non-exposure group (n= 48) |
|------------|-----------------------------|----------------------------|----------------------------|
| WTA        | 2.83±0.74                   | 2.19±0.90**                | 1.68±0.68**##              |
| REP        | 2.13±0.74                   | 1.82±0.71*                 | 1.57±0.68**                |
| PCI        | 1.79±0.48                   | 1.68±0.67                  | 1.51±0.55*                 |
| IRMP       | 1.31±0.40                   | 1.47±0.72                  | 1.29±0.53                  |

Compared with high-exposure group, \*p< 0.05, \*\*p< 0.01. Compared with Low-exposure group, #p< 0.05, ##p< 0.01.

**Supplementary Table 9. PTSS-10**

Below you find ten questions about common reactions among people who have been involved in an accident or a disaster. Kindly answer each question to indicate how you have been reacting during the last seven days. If in doubt, take the alternative closest to how you feel or react.

Please answer all the questions.

|                                          |                                                                        |
|------------------------------------------|------------------------------------------------------------------------|
| During the last seven days you have had: |                                                                        |
| 1.                                       | Difficulty with sleep                                                  |
| 2.                                       | Nightmares about the accident or disaster                              |
| 3.                                       | Depressed feelings                                                     |
| 4.                                       | Tendencies to jump or startle at sudden noises or unexpected movements |
| 5.                                       | Tendencies to withdraw myself from others                              |
| 6.                                       | Irritable feelings (I am easily getting irritable or infuriated)       |
| 7.                                       | Frequent swings in mood                                                |
| 8.                                       | Bad conscience, self accusations or guilt                              |

|     |                                                                                     |
|-----|-------------------------------------------------------------------------------------|
| 9.  | Fears when approaching the place of the accident or situations that remind me of it |
| 10. | Tensions in my body                                                                 |

**Supplementary Figure 1. Sampling process**

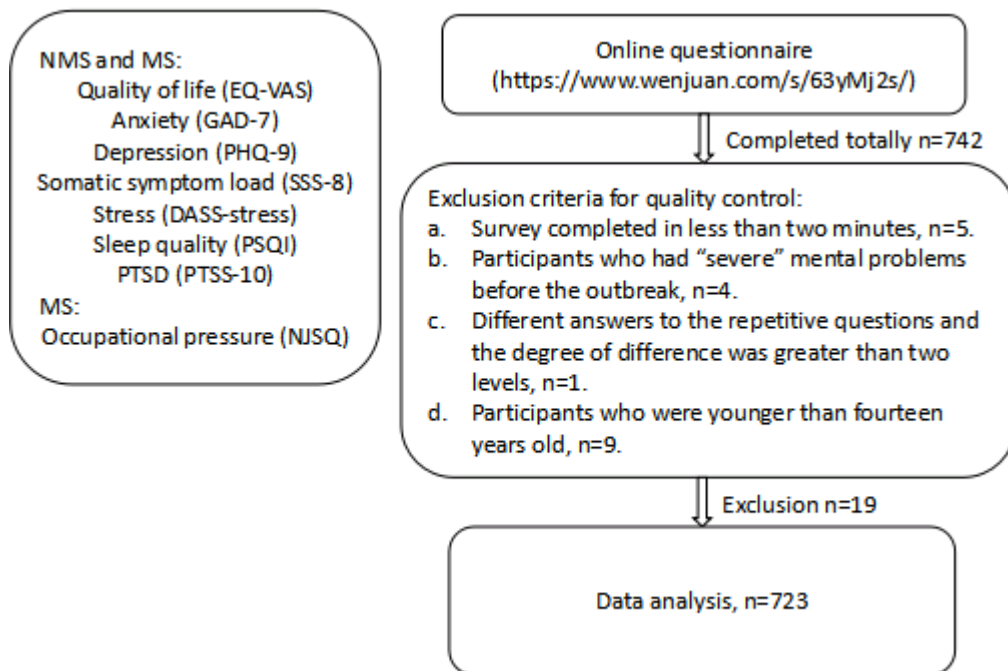

Supplement: Data_Sheet_1.pdf [file Data_Sheet_1.pdf]
